# Supplementary material for: Gene expression and proteomic analysis of shoot apical meristem transition from dormancy to activation in Cunninghamia lanceolata (Lamb.) Hook
Source: PubMed Central journal article supplement (PMC4735791; doi:10.1038/srep19938), 2016-02-02
Supplement: srep19938-s1.pdf [file srep19938-s1.pdf]

**Gene expression and proteomic analysis of shoot apical meristem transition from dormancy to activation in  
*Cunninghamia lanceolata* (Lamb.) Hook.**

**Huimin Xu<sup>1</sup>, Dechang Cao<sup>1</sup>, Yanmei Chen<sup>2</sup>, Dongmei Wei<sup>3</sup>, Yanwei Wang<sup>1</sup>, Rebecca Ann Stevenson<sup>4</sup>, Yingfang Zhu<sup>4</sup>, Jinxing Lin<sup>1\*</sup>**

Table S1 Differentially expressed proteins identified by LC-MS<sup>E</sup>

| Accession no.                           | Protein name                                 | Log<br>R/D bud | P<br>value | Log<br>A/ D bud | P<br>value | Log<br>A/ R bud | P<br>value |
|-----------------------------------------|----------------------------------------------|----------------|------------|-----------------|------------|-----------------|------------|
| <b>Amino acid metabolism</b>            |                                              |                |            |                 |            |                 |            |
| ABK24266.1                              | Putative uncharacterized protein             | inf            | 0.31       | #N/A            | #N/A       | -1.87           | 0.29       |
| ABR17712.1                              | Putative uncharacterized protein             | inf            | 0.18       | inf             | 0.21       | -1.75           | 0.10       |
| ABK22122.1                              | Putative uncharacterized protein             | 1.03           | 0.00       | 1.31            | 0.19       | 0.28            | 0.63       |
| ACN39946.1                              | Putative uncharacterized protein             | -0.77          | 0.56       | 0.84            | 0.21       | 1.61            | 0.17       |
| CAA53078.1                              | 3-ketoacyl-coa thiolase B                    | 0.73           | 0.65       | -1.30           | 0.41       | -2.03           | 0.40       |
| Q9FVG7.1                                | S-adenosylmethionine synthetase 2            | 2.31           | 0.01       | 2.27            | 0.00       | -0.04           | 0.88       |
| <b>Carbon metabolic process</b>         |                                              |                |            |                 |            |                 |            |
| AAM81204.1                              | Fructose-1,6-diphosphate aldolase            | 1.74           | 0.09       | 1.77            | 0.02       | 0.03            | 0.95       |
| ACU23111.1                              | Fructose-bisphosphate aldolase               | -1.60          | 0.13       | 0.17            | 0.58       | 1.77            | 0.10       |
| ACU21446.1                              | Fumarylacetoacetase                          | 1.06           | 0.06       | -0.54           | 0.68       | -1.60           | 0.15       |
| CAC80374.1                              | Glyceraldehyde-3-phosphate dehydrogenase     | 1.87           | 0.17       | 2.27            | 0.00       | 0.40            | 0.49       |
| AAA34077.1                              | Glyceraldehyde-3-phosphate dehydrogenase     | 2.63           | 0.10       | 1.48            | 0.43       | -1.15           | 0.30       |
| ABP68613.1                              | Malic enzyme                                 | -3.34          | 0.09       | -inf            | 0.13       | #N/A            | #N/A       |
| AAP68889.1                              | Putative glyoxysomal malate dehydrogenase    | inf            | 0.24       | #N/A            | #N/A       | -1.48           | 0.41       |
| BAF46028.1                              | Putative Adomet decarboxylase                | 2.09           | 0.01       | 1.98            | 0.00       | -0.12           | 0.68       |
| XP_002520198.1                          | Pyruvate dehydrogenase, putative             | -1.30          | 0.11       | -1.49           | 0.06       | -0.19           | 0.87       |
| XP_002520198.1                          | Pyruvate dehydrogenase, putative             | -1.30          | 0.11       | -1.49           | 0.06       | -0.19           | 0.87       |
| AAT80327.1                              | UDP-D-glucuronate decarboxylase              | 3.58           | 0.01       | 3.27            | 0.04       | -0.31           | 0.52       |
| <b>Cytoskeleton</b>                     |                                              |                |            |                 |            |                 |            |
| O81982.1                                | Profilin                                     | -2.14          | 0.33       | -inf            | 0.37       | #N/A            | #N/A       |
| EEC74344.1                              | Tubulin beta-2 chain                         | 0.96           | 0.11       | 1.31            | 0.12       | 0.34            | 0.57       |
| XP_002283198.1                          | Putative uncharacterized protein             | 1.57           | 0.00       | 1.64            | 0.05       | 0.07            | 0.86       |
| <b>Energy production and conversion</b> |                                              |                |            |                 |            |                 |            |
| XP_001771011.1                          | Phosphoribulokinase                          | 1.79           | 0.27       | 2.18            | 0.03       | 0.39            | 0.64       |
| BAD45421.1                              | Putative cytosolic phosphoglycerate kinase 1 | 0.98           | 0.07       | 1.30            | 0.00       | 0.32            | 0.29       |
| XP_002321126.1                          | Aconitate hydratase                          | inf            | 0.00       | #N/A            | #N/A       | -2.37           | 0.01       |
| Q43130.1                                | Enolase                                      | -1.61          | 0.04       | -1.62           | 0.04       | 0.00            | 0.99       |
| CAF21946.1                              | ATP synthase beta subunit                    | -3.17          | 0.27       | -inf            | 0.39       | #N/A            | #N/A       |
| BAH73398.1                              | ATP synthase CF1 alpha subunit               | 1.26           | 0.35       | 1.60            | 0.34       | 0.35            | 0.78       |

| Accession no.              | Protein name                                                                       | Log<br>R/D bud | P<br>value | Log<br>A/ D bud | P<br>value | Log<br>A/ R bud | P<br>value |
|----------------------------|------------------------------------------------------------------------------------|----------------|------------|-----------------|------------|-----------------|------------|
| <b>P31541.1</b>            | ATP-dependent Clp protease ATP-binding subunit clpa homolog<br>CD4A, chloroplastic | 2.55           | 0.19       | 3.03            | 0.04       | 0.49            | 0.55       |
| <b>AAC06385.1</b>          | Early fruit mrna                                                                   | inf            | 0.15       | inf             | 0.17       | -2.33           | 0.21       |
| <b>CAJ42303.1</b>          | VDAC-like porin                                                                    | -1.42          | 0.31       | -1.46           | 0.30       | -0.04           | 0.97       |
| <b>AAD03393.1</b>          | ATPase beta subunit                                                                | -1.30          | 0.01       | -1.11           | 0.01       | 0.18            | 0.48       |
| <b>ABR16190.1</b>          | Cyt_c_oxidase_su6a                                                                 | -1.48          | 0.29       | -1.11           | 0.40       | 0.37            | 0.76       |
| <b>AAP80659.1</b>          | Dynammin like Pr6(ADL6)                                                            | inf            | 0.19       | #N/A            | #N/A       | -1.62           | 0.33       |
| <b>AAR27291.1</b>          | Peptidyl-prolyl cis-trans isomerase                                                | -1.47          | 0.01       | -1.03           | 0.03       | 0.44            | 0.32       |
| <b>XP_002320625.1</b>      | Succinyl-coa ligase beta-chain family protein                                      | -3.09          | 0.01       | -2.44           | 0.03       | #N/A            | #N/A       |
| <b>XP_001765853.1</b>      | Predicted protein                                                                  | 0.14           | 0.90       | -1.29           | 0.40       | -1.43           | 0.22       |
| <b>Hormone metabolism</b>  |                                                                                    |                |            |                 |            |                 |            |
| <b>AAP31311.2</b>          | ABI3-interacting protein 1                                                         | -inf           | 0.01       | -1.54           | 0.14       | #N/A            | #N/A       |
| <b>AAP31312.2</b>          | ABI3-interacting protein 2                                                         | -1.69          | 0.34       | -1.92           | 0.29       | #N/A            | #N/A       |
| <b>Nucleosome assembly</b> |                                                                                    |                |            |                 |            |                 |            |
| <b>ABK24519.1</b>          | Putative uncharacterized protein                                                   | -inf           | 0.47       | -3.43           | 0.43       | #N/A            | #N/A       |
| <b>ABK26056.1</b>          | Histone H2B                                                                        | 1.17           | 0.10       | 1.34            | 0.14       | 0.18            | 0.72       |
| <b>BAE92289.1</b>          | Putative histone H1                                                                | 4.27           | 0.40       | #N/A            | #N/A       | -inf            | 0.38       |
| <b>Photosynthesis</b>      |                                                                                    |                |            |                 |            |                 |            |
| <b>AAB41553.1</b>          | 6-phosphogluconate dehydrogenase, decarboxylating                                  | inf            | 0.18       | #N/A            | #N/A       | -3.30           | 0.05       |
| <b>A4QK31.1</b>            | Cytochrome f                                                                       | 3.37           | 0.10       | 2.68            | 0.21       | -0.68           | 0.51       |
| <b>BAH73335.1</b>          | Cytochrome f                                                                       | 1.29           | 0.11       | 1.93            | 0.03       | 0.64            | 0.18       |
| <b>CAB60127.1</b>          | Cytosolic phosphoglucomutase                                                       | 2.97           | 0.22       | 1.94            | 0.05       | -1.03           | 0.47       |
| <b>XP_002273783.1</b>      | Lyceraldehyde-3-phosphate dehydrogenase B, chloroplastic isoform<br>2              | 1.41           | 0.29       | 1.80            | 0.01       | 0.39            | 0.56       |
| <b>ACM51422.1</b>          | Mg-protoporphyrin IX chelatase                                                     | 2.21           | 0.03       | 1.70            | 0.32       | -0.51           | 0.48       |
| <b>XP_002307234.1</b>      | O2 evolving complex 33kd family protein                                            | -0.87          | 0.12       | -1.91           | 0.06       | -1.04           | 0.22       |
| <b>NP_042469.1</b>         | Photosystem II 44 kda protein                                                      | 3.24           | 0.30       | 1.58            | 0.40       | -1.67           | 0.37       |
| <b>BAH73339.1</b>          | Photosystem II CP47 chlorophyll apoprotein                                         | 4.10           | 0.26       | 2.86            | 0.08       | -1.24           | 0.40       |
| <b>AAx76828.1</b>          | Photosystem II subunit A                                                           | inf            | 0.30       | inf             | 0.20       | -1.36           | 0.46       |
| <b>ACA30289.1</b>          | Putative ribulose-1,5-bisphosphate carboxylase/oxygenase activase<br>alpha 2       | 5.34           | 0.04       | 5.16            | 0.38       | -0.18           | 0.89       |
| <b>AAA63163.1</b>          | Ribulose 1,5-bisphosphate carboxylase activase isoform 1                           | 3.28           | 0.00       | 2.78            | 0.41       | -0.50           | 0.65       |

| Accession no.            | Protein name                                                  | Log<br>R/D bud | P<br>value | Log<br>A/ D bud | P<br>value | Log<br>A/ R bud | P<br>value |
|--------------------------|---------------------------------------------------------------|----------------|------------|-----------------|------------|-----------------|------------|
| AAG22772.1               | Ribulose-1,5-biphosphate carboxylase/oxygenase large subunit  | -0.08          | 0.96       | #N/A            | #N/A       | -3.09           | 0.11       |
| AAN71862.1               | Ribulose-1,5-bisphosphate carboxylase                         | 3.94           | 0.22       | 3.49            | 0.02       | -0.45           | 0.65       |
| AAW29427.1               | Ribulose-1,5-bisphosphate carboxylase/oxygenase large subunit | inf            | 0.15       | #N/A            | #N/A       | -2.47           | 0.16       |
| AAL11902.1               | Ribulose-1,5-bisphosphate carboxylase/oxygenase large subunit | 3.11           | 0.28       | 1.62            | 0.33       | -1.48           | 0.42       |
| AAS88137.1               | Ribulose-1,5-bisphosphate carboxylase/oxygenase large subunit | 1.86           | 0.07       | 1.65            | 0.17       | -0.21           | 0.76       |
| <b>Redox regulation</b>  |                                                               |                |            |                 |            |                 |            |
| ABK23157.1               | Putative uncharacterized protein                              | 2.68           | 0.05       | 1.32            | 0.61       | -1.36           | 0.27       |
| XP_002283310.1           | Mitochondrial-processing peptidase subunit alpha              | -2.81          | 0.03       | -1.93           | 0.09       | #N/A            | #N/A       |
| CAB71293.1               | Chloroplast ferredoxin-NADP+ oxidoreductase                   | 1.26           | 0.10       | 1.35            | 0.01       | 0.09            | 0.81       |
| AAQ14591.1               | Copper/zinc superoxide dismutase                              | -2.42          | 0.20       | -2.18           | 0.21       | 0.24            | 0.73       |
| XP_002528162.1           | Glycine cleavage system h protein, putative                   | -inf           | 0.14       | -2.52           | 0.15       | #N/A            | #N/A       |
| CAN63539.1               | Hypothetical protein VITISV_016625                            | 2.47           | 0.07       | 1.73            | 0.14       | -0.75           | 0.26       |
| AAA96137.1               | Peroxidase                                                    | #N/A           | #N/A       | 0.16            | 0.94       | 1.47            | 0.58       |
| ACD56608.1               | Putative protein disulfide                                    | -1.78          | 0.36       | -1.93           | 0.34       | -0.16           | 0.89       |
| ACN39940.1               | Putative uncharacterized protein                              | -1.60          | 0.32       | -1.12           | 0.41       | 0.49            | 0.10       |
| ABK24614.1               | Putative uncharacterized protein                              | -1.40          | 0.01       | -1.22           | 0.01       | 0.18            | 0.66       |
| ABR16663.1               | Putative uncharacterized protein                              | 2.28           | 0.01       | 2.13            | 0.04       | -0.16           | 0.70       |
| ABR16034.1               | Putative uncharacterized protein                              | -1.50          | 0.56       | #N/A            | #N/A       | -inf            | 0.18       |
| ABK21331.1               | Putative uncharacterized protein                              | -1.35          | 0.03       | -1.52           | 0.04       | -0.17           | 0.69       |
| ABR16661.1               | Putative uncharacterized protein                              | #N/A           | #N/A       | 1.35            | 0.40       | inf             | 0.30       |
| XP_001785162.1           | Putative uncharacterized protein                              | 0.73           | 0.28       | -0.56           | 0.62       | -1.29           | 0.06       |
| EEE62118.1               | Glutathione_s-trfase_n                                        | -4.60          | 0.44       | #N/A            | #N/A       | -inf            | 0.30       |
| AAK27264.1               | Isoflavone reductase-like protein CJP-6                       | -1.43          | 0.13       | -1.81           | 0.11       | -0.38           | 0.07       |
| <b>Ribosome assembly</b> |                                                               |                |            |                 |            |                 |            |
| ACN40331.1               | Cyanate hydratase                                             | -1.52          | 0.37       | -2.17           | 0.29       | -0.65           | 0.52       |
| XP_002510412.1           | Protein yrdA, putative                                        | -2.05          | 0.01       | -3.05           | 0.01       | -1.00           | 0.53       |
| ABB87125.1               | Ribosomal_S11                                                 | 1.21           | 0.17       | 1.49            | 0.08       | 0.28            | 0.47       |
| ABR17947.1               | Putative uncharacterized protein                              | 2.48           | 0.03       | 2.65            | 0.01       | 0.18            | 0.59       |
| EEH59263.1               | Predicted protein                                             | inf            | 0.27       | #N/A            | #N/A       | -3.21           | 0.25       |
| <b>Stress response</b>   |                                                               |                |            |                 |            |                 |            |
| AAR12193.1               | Heat shock protein 90                                         | 2.21           | 0.23       | 0.27            | 0.90       | -1.93           | 0.26       |
| XP_002517727.1           | Cationic peroxidase 1 precursor, putative                     | -4.18          | 0.35       | -5.26           | 0.33       | -1.08           | 0.49       |

| Accession no.               | Protein name                                 | Log<br>R/D bud | P<br>value | Log<br>A/ D bud | P<br>value | Log<br>A/ R bud | P<br>value |
|-----------------------------|----------------------------------------------|----------------|------------|-----------------|------------|-----------------|------------|
| ACT82479.1                  | Chloroplast stromal ascorbate peroxidase 12  | -1.42          | 0.13       | -1.85           | 0.06       | -0.44           | 0.57       |
| XP_001760558.1              | Cysteine_dsase                               | -2.01          | 0.09       | -3.61           | 0.02       | -1.60           | 0.12       |
| ACN60402.1                  | Flavanone 3-beta-hydroxylase                 | #N/A           | #N/A       | 1.79            | 0.45       | 2.34            | 0.38       |
| ABQ96600.1                  | Glutathione peroxidase                       | -0.89          | 0.12       | -2.39           | 0.03       | -1.50           | 0.21       |
| ABJ80949.1                  | Hsp90                                        | inf            | 0.10       | inf             | 0.26       | -2.01           | 0.11       |
| Q9STX5.1                    | Endoplasmin homolog                          | 1.50           | 0.07       | 1.57            | 0.15       | 0.07            | 0.90       |
| XP_002447413.1              | Hypothetical protein SORBIDRAFT_06g000660    | 2.10           | 0.06       | 2.13            | 0.12       | 0.03            | 0.96       |
| BAA93024.1                  | Putative phosphogluconate dehydrogenase      | inf            | 0.18       | inf             | 0.20       | -2.04           | 0.22       |
| ABK25734.1                  | Putative uncharacterized protein             | inf            | 0.18       | #N/A            | #N/A       | 1.99            | 0.54       |
| ABK24283.1                  | Putative uncharacterized protein             | 2.10           | 0.04       | 2.68            | 0.13       | 0.59            | 0.51       |
| ACN39800.1                  | Unknown                                      | 2.41           | 0.00       | 2.25            | 0.06       | -0.15           | 0.72       |
| ABK26682.1                  | Putative uncharacterized protein             | 0.56           | 0.40       | 1.62            | 0.16       | 1.06            | 0.29       |
| <b>Translation</b>          |                                              |                |            |                 |            |                 |            |
| AAK85129.1                  | Elongation factor                            | 1.62           | 0.01       | 1.60            | 0.24       | -0.02           | 0.98       |
| CAA11705.1                  | Elongation factor 1 alpha subunit            | 2.84           | 0.02       | 2.88            | 0.21       | 0.04            | 0.96       |
| XP_002312029.1              | Elongation factor 1-alpha                    | 2.45           | 0.07       | 2.77            | 0.22       | 0.32            | 0.72       |
| BAD26337.1                  | Elongation factor 2                          | 2.31           | 0.08       | 1.37            | 0.01       | -0.94           | 0.13       |
| AAS58429.1                  | Elongation factor Tu                         | 3.26           | 0.02       | 2.77            | 0.01       | -0.49           | 0.30       |
| BAD07825.1                  | Putative 60S ribosomal protein L9            | 4.54           | 0.00       | 4.52            | 0.00       | -0.02           | 0.95       |
| BAE92290.1                  | Putative elongation factor                   | -2.00          | 0.28       | -2.41           | 0.24       | -0.41           | 0.75       |
| CAC27139.1                  | Translation elongation factor-1 alpha        | 3.16           | 0.01       | 3.08            | 0.17       | -0.07           | 0.93       |
| <b>Transporter activity</b> |                                              |                |            |                 |            |                 |            |
| NP_001065986.1              | Non-specific lipid-transfer protein 2B       | 0.64           | 0.43       | 1.82            | 0.34       | 1.18            | 0.44       |
| 1109190A                    | Calmodulin                                   | -2.61          | 0.37       | -2.55           | 0.38       | 0.06            | 0.91       |
| P02662.2                    | Antioxidant peptide                          | -inf           | 0.06       | -1.59           | 0.18       | #N/A            | #N/A       |
| XP_002528311.1              | Clathrin heavy chain, putative               | inf            | 0.21       | #N/A            | #N/A       | -1.74           | 0.33       |
| BAF08021.2                  | Os02g0184200                                 | 3.31           | 0.34       | #N/A            | #N/A       | -2.36           | 0.34       |
| XP_002456080.1              | Putative uncharacterized protein Sb03g030060 | -0.81          | 0.27       | -1.50           | 0.17       | -0.69           | 0.67       |
| XP_002310404.1              | Uncharacterized protein                      | inf            | 0.27       | #N/A            | #N/A       | -1.49           | 0.44       |
| ABR17902.1                  | Putative uncharacterized protein             | -2.83          | 0.03       | -2.55           | 0.03       | 0.29            | 0.26       |
| <b>Unknown</b>              |                                              |                |            |                 |            |                 |            |
| XP_002276912.1              | Hypothetical protein isoform 2               | 2.09           | 0.04       | 2.98            | 0.15       | 0.89            | 0.43       |

| Accession no.         | Protein name                     | Log<br>R/D bud | P<br>value | Log<br>A/ D bud | P<br>value | Log<br>A/ R bud | P<br>value |
|-----------------------|----------------------------------|----------------|------------|-----------------|------------|-----------------|------------|
| <b>XP_002531232.1</b> | Transcription factor, putative   | -inf           | 0.19       | -1.78           | 0.29       | #N/A            | #N/A       |
| <b>ACN40912.1</b>     | Uncharacterized protein          | inf            | 0.01       | #N/A            | #N/A       | -2.33           | 0.02       |
| <b>ACN40697.1</b>     | Unknown                          | -1.40          | 0.12       | -1.56           | 0.07       | -0.16           | 0.83       |
| <b>ACU20577.1</b>     | Unknown                          | -1.85          | 0.15       | -1.65           | 0.11       | 0.20            | 0.78       |
| <b>ACN40685.1</b>     | Unknown                          | -1.79          | 0.20       | -2.52           | 0.20       | -0.73           | 0.45       |
| <b>ACN40755.1</b>     | Unknown                          | 3.98           | 0.21       | #N/A            | #N/A       | -inf            | 0.30       |
| <b>ACN41066.1</b>     | Unknown                          | -2.82          | 0.01       | -inf            | 0.04       | #N/A            | #N/A       |
| <b>ACJ85785.1</b>     | Unknown                          | 2.63           | 0.00       | 2.88            | 0.05       | 0.25            | 0.64       |
| <b>ACN40584.1</b>     | Unknown                          | 2.19           | 0.17       | 2.40            | 0.28       | 0.21            | 0.84       |
| <b>ACU23974.1</b>     | Unknown                          | 1.10           | 0.42       | 1.50            | 0.29       | 0.40            | 0.72       |
| <b>ABR18217.1</b>     | Putative uncharacterized protein | 1.28           | 0.38       | 1.47            | 0.47       | 0.19            | 0.90       |
| <b>ABK26810.1</b>     | Unknown                          | 1.48           | 0.07       | 1.45            | 0.24       | -0.03           | 0.96       |
| <b>ACN40726.1</b>     | Unknown                          | -2.15          | 0.16       | -1.49           | 0.21       | 0.66            | 0.67       |
| <b>ACN40616.1</b>     | Unknown                          | -0.96          | 0.02       | -1.51           | 0.05       | -0.55           | 0.45       |
| <b>CAO65998.1</b>     | Unnamed protein product          | 2.56           | 0.01       | 2.13            | 0.21       | -0.42           | 0.56       |
| <b>CAV26532.1</b>     | Unnamed protein product          | 1.60           | 0.02       | 1.48            | 0.26       | -0.12           | 0.87       |
| <b>CAY34137.1</b>     | Unnamed protein product          | -2.89          | 0.31       | -2.08           | 0.37       | 0.81            | 0.73       |
| <b>CAO43976.1</b>     | Unnamed protein product          | -2.05          | 0.42       | -2.19           | 0.42       | -0.13           | 0.86       |
| <b>CAW84864.1</b>     | Unnamed protein product          | -5.04          | 0.01       | -3.92           | 0.00       | 1.12            | 0.39       |
| <b>CAY38961.1</b>     | Unnamed protein product          | 3.30           | 0.00       | 2.76            | 0.40       | -0.54           | 0.62       |
| <b>CAV26040.1</b>     | Unnamed protein product          | 3.58           | 0.04       | 2.69            | 0.22       | -0.89           | 0.34       |
| <b>CAV25021.1</b>     | Unnamed protein product          | -2.87          | 0.42       | -3.80           | 0.39       | -0.93           | 0.19       |

Note: R, reactivating bud; D, dormant bud; A, active bud. The fold-change of different stages of bud described by log scale (1.3-fold-change). The positive and negative value represents that the fold-change of up-regulated and down-regulated differential proteins, respectively.
